# Supplementary material for: Integration of Gold Nanoparticles into Crosslinker-Free Polymer Particles and Their Colloidal Catalytic Property
Source: MDPI journal article supplement (doi:10.3390/nano13030416), 2023-01-19
Supplement: s1 [file s1]

# Integration of Gold Nanoparticles into Crosslinker-Free Polymer Particles and Their Colloidal Catalytic Property

Jian Hou<sup>1</sup>, Bin Li,<sup>1,2,\*</sup> Wongi Jang,<sup>3</sup> Jaehan Yun,<sup>3</sup> Faith M. Eyimegwu,<sup>3</sup> and Jun-Hyun Kim<sup>3,\*</sup>

<sup>1</sup> School of Intelligent Manufacturing, Luoyang Institute of Science and Technology, Luoyang 471023, China

<sup>2</sup> Henan International Joint Laboratory of Cutting Tools and Precision Machining, Luoyang Institute of Science and Technology, Luoyang 471023, China

<sup>3</sup> Department of Chemistry, Illinois State University, Normal, IL 61790-4160, USA

\* Correspondence: libin@lit.edu.cn (B.L.) and jkim5@ilstu.edu (J.-H.K.)

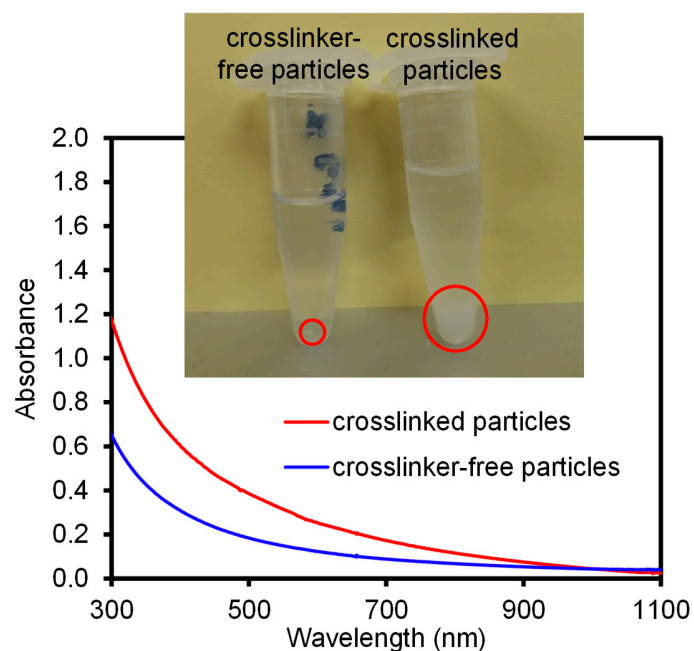

**Figure S1.** A digital photo and absorbance of crosslinker-free and crosslinked PNIPAM particles in water after centrifugation (red circles indicate the precipitated particles).

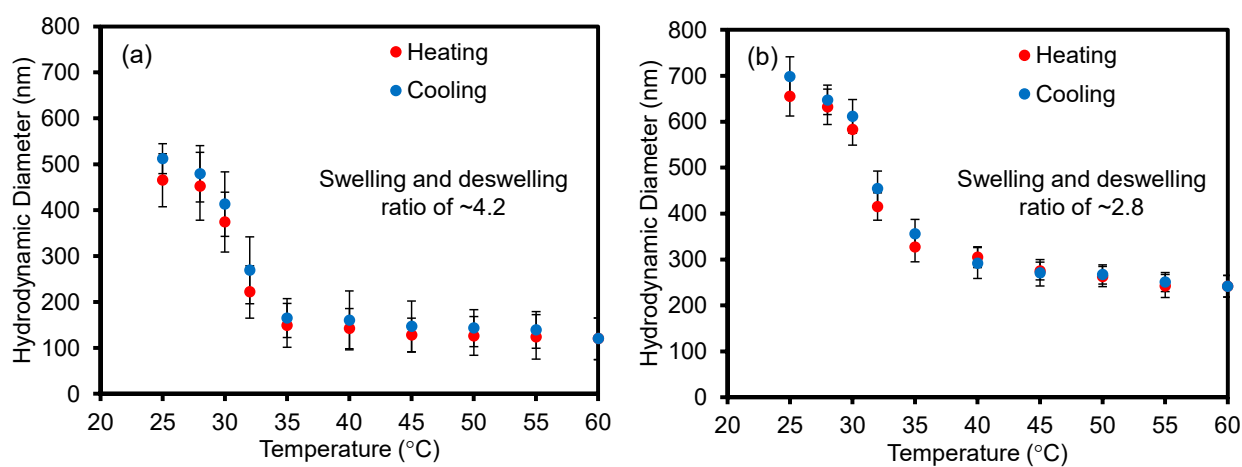

**Figure S2.** Hydrodynamic diameter changes of (a) crosslinker-free and (b) crosslinked PNIPAM particles as a function of temperature.

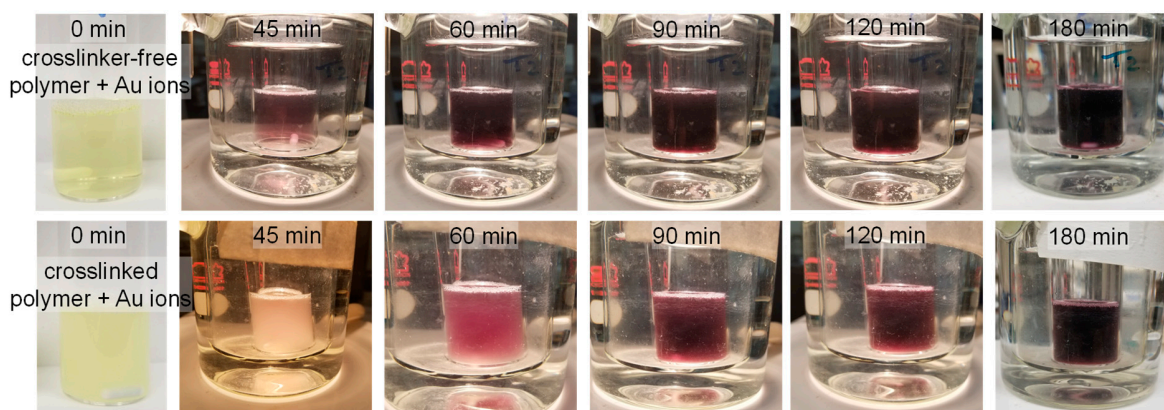

**Figure S3.** The reduction process of gold ions in the presence of crosslinker-free (top) and crosslinked (bottom) polymer particles under a solar-simulated light source as a function of time.

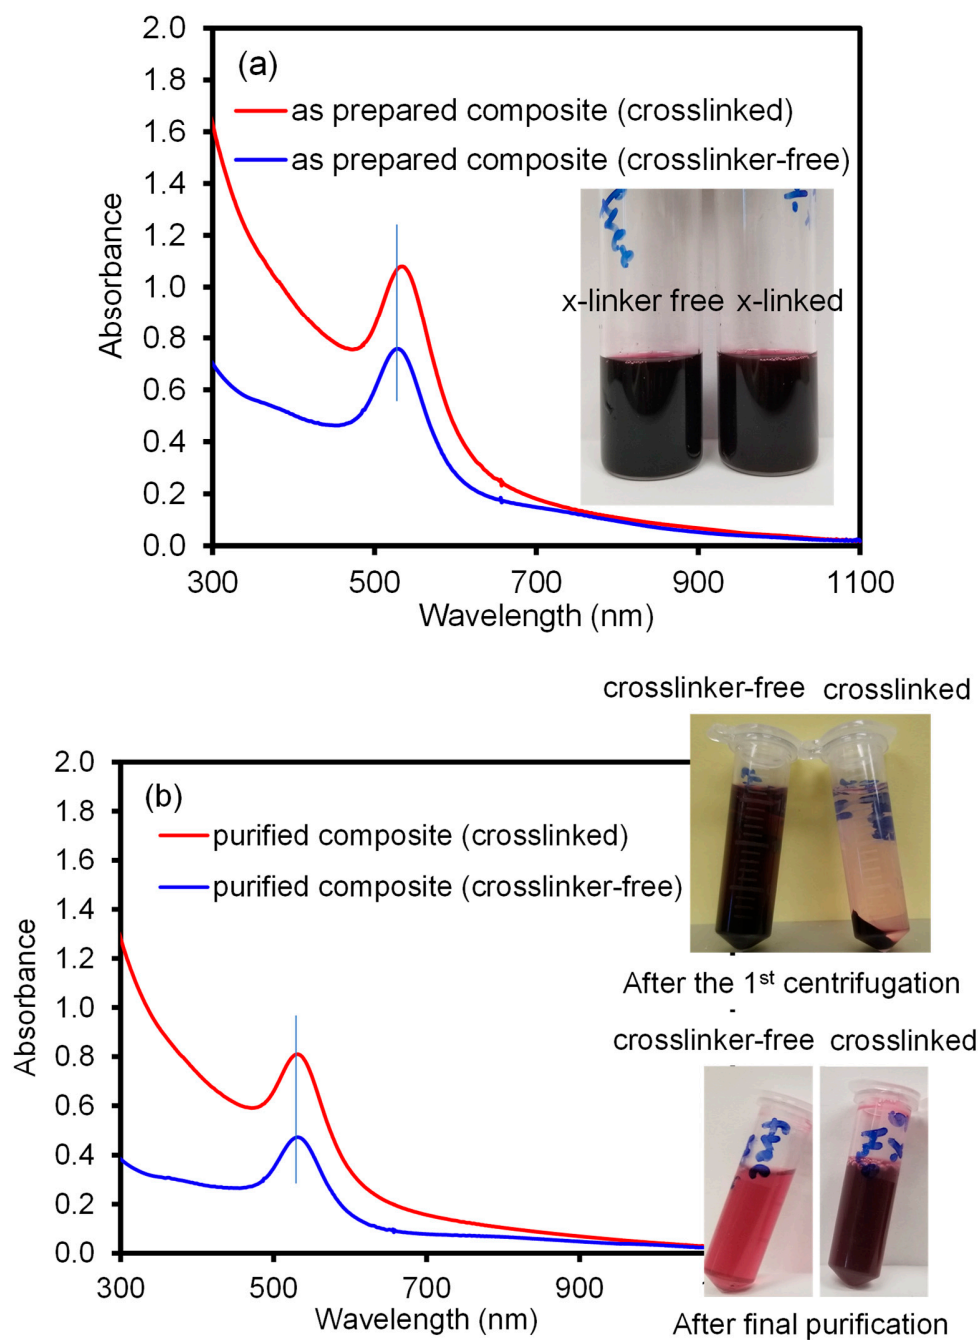

**Figure S4.** Absorption (i.e., SPR) patterns of crosslinker-free and crosslinked composite particles (a) before and (b) after the purification as well as their corresponding photos.

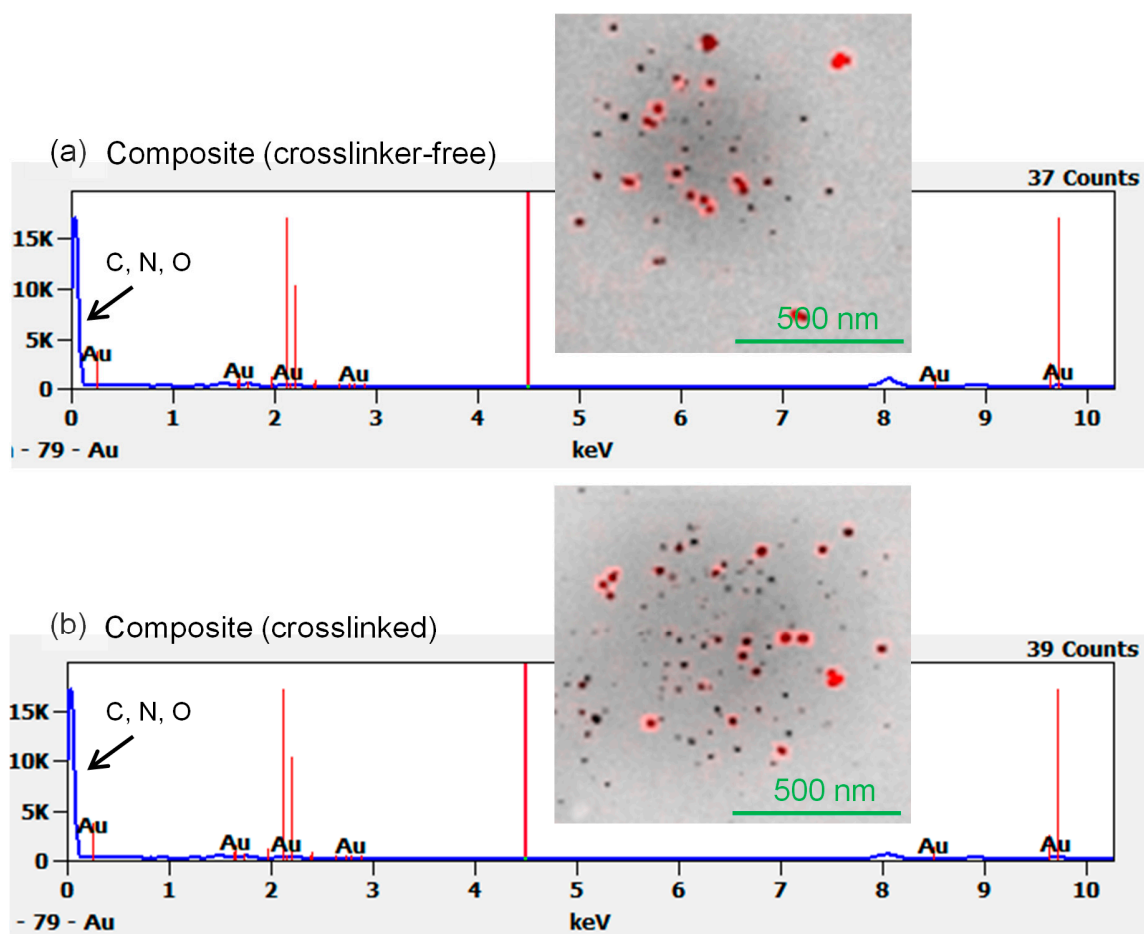

**Figure S5.** Energy dispersive x-ray maps and spectra for composite particles prepared with (a) crosslinker-free and (b) crosslinked PNIPAM particles.

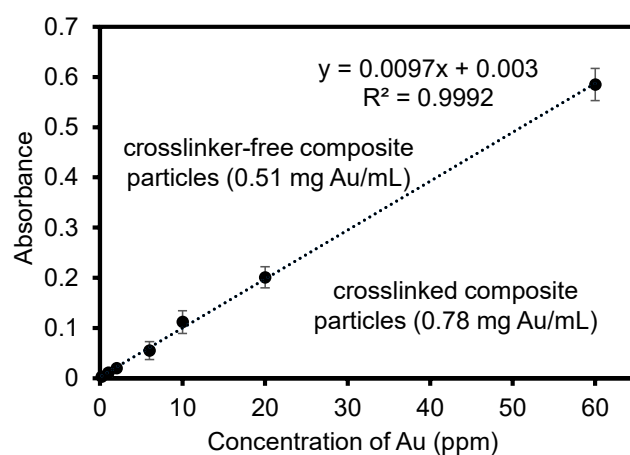

**Figure S6.** Calibration curve of Au atom standards by atomic absorption spectroscopy.

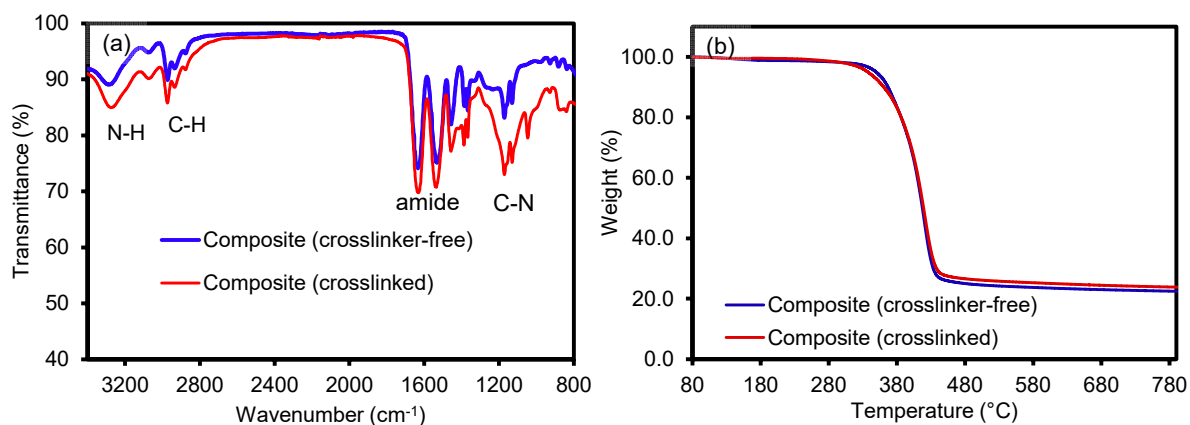

Obtained by a Spectrum 100 FT-IR Spectrometer (Perkin Elmer) equipped with an ATR sampling accessory under the following conditions (scan range: 4,000 to 650 cm<sup>-1</sup>, resolution of 4 cm<sup>-1</sup>, 64 scans).

Obtained by a thermogravimetric analyzer (SDT Q600, TA Instrument) under the following conditions (10 min of pre-heating at 80 °C, a ramping rate of 25 °C /min from 80 °C to 800 °C, 50 mL/min N<sub>2</sub> gas flow).

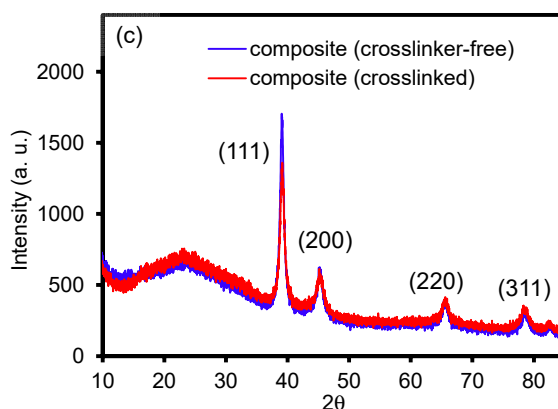

Obtained by a benchtop powder X-ray diffraction system with Cu Kα radiation (MiniFlex 600, Rigaku Corp.) under the following conditions (scan range: 5-85°, 0.02 steps, 5 degree/min)

**Figure S7.** Additional characterization of crosslinker-free and crosslinked composite particles by (a) Fourier transform infrared spectrometer, (b) thermogravimetric analyzer, and (c) powder x-ray diffractometer.

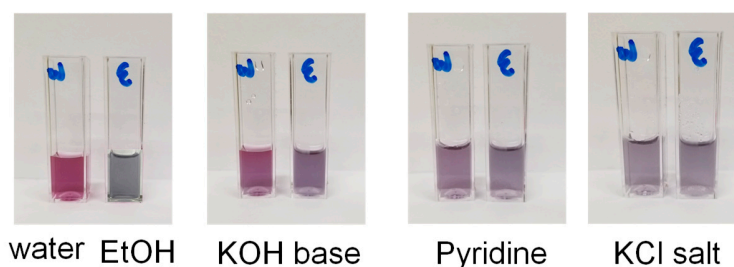

**Figure S8.** Stability of bare AuNPs in water and EtOH under various conditions.
